# Supplementary material for: A Preliminary Study on the Functionality of the Carotid-Vertebral Anastomotic Artery in the Regulation of Blood Flow in the Giraffe (Giraffa camelopardalis) by Duplex Ultrasound Examination
Source: Hindawi journal article supplement (doi:10.1155/2023/8395360), 2023-02-27
Supplement: f1 [file 8395360.f1.docx]

SUPPLEMENTARY FIGURES


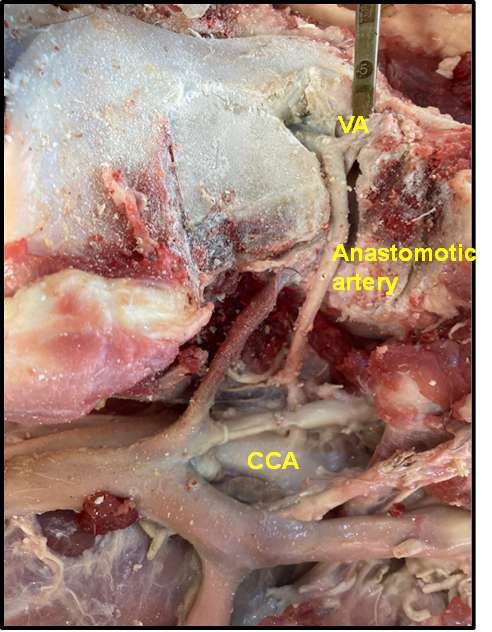


Figure 1 a: Visual illustration of the detailed dissection of the carotid-vertebral anastomosis VA: Vertebral artery, CCA: Common carotid artery


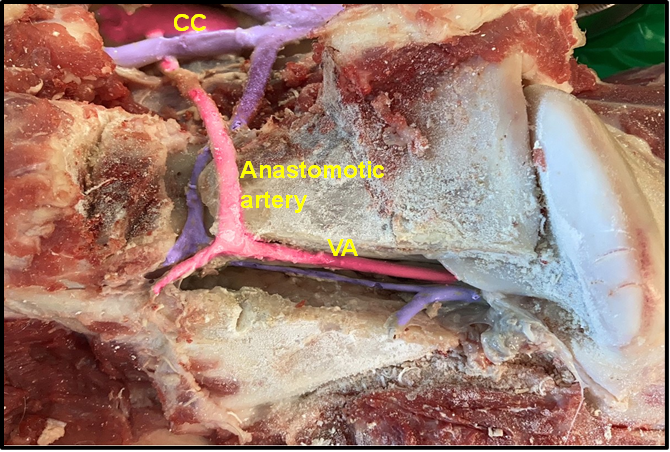


Figure 1 b: Visual illustration of the latex model during detailed dissection of the carotid-vertebral anastomosis VA: Vertebral artery, CCA: Common carotid artery
